# Supplementary material for: Spiro-OMeTAD or CuSCN as a preferable hole transport material for carbon-based planar perovskite solar cells
Source: Royal Society of Chemistry journal article supplement (doi:10.1039/d0ta03951a), 2020-01-01
Supplement: d0ta03951a1.pdf [file d0ta03951a1.pdf]

## Supporting Information

# **Spiro-OMeTAD or CuSCN as a preferable hole transport material for carbon-based planar perovskite solar cells?**

*Yang Yang, Minh Tam Hoang, Disheng Yao, Ngoc Duy Pham, Vincent Tiing Tiong,  
Xiaoxiang Wang, Hongxia Wang \**

School of Chemistry, Physics and Mechanical Engineering, Science and Engineering Faculty,  
Queensland University of Technology, Brisbane 4001, Australia

\*Corresponding Author.

E-mail address: [hx.wang@qut.edu.au](mailto:hx.wang@qut.edu.au) (H.X. Wang).

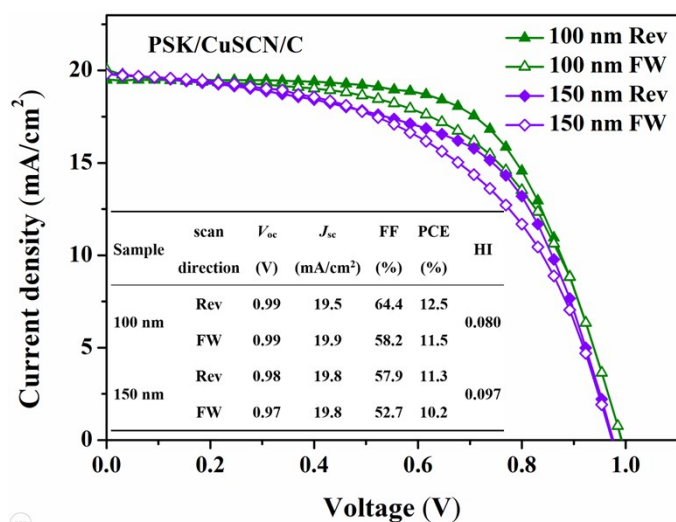

Figure S1.  $J$ - $V$  curves of the PSK/CuSCN/C with different thickness of CuSCN layer under reverse and forward scans.

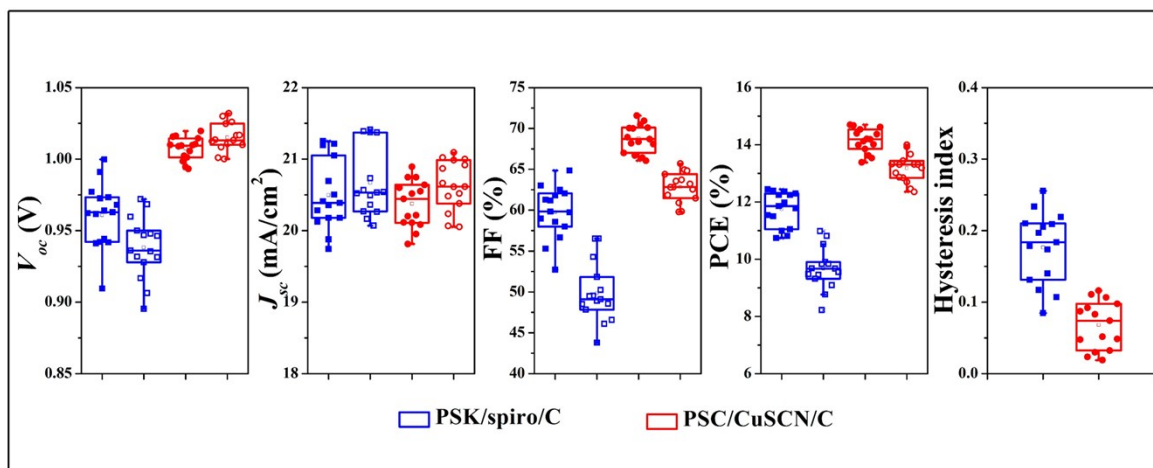

Figure S2. Statistical photovoltaic parameters for 15 cells based on spiro-OMeTAD and CuSCN with an illumination area of 0.115 cm<sup>2</sup> under both reverse and forward scan.

Table S1. Photovoltaic parameters for 15 cells based on spiro-OMeTAD and CuSCN measured under 1 sun illumination condition at both reverse and forward scans.

| sample      | scan direction | $V_{oc}$ (V) | $J_{sc}$ (mA/cm <sup>2</sup> ) | FF (%)     | PCE (%)    | HI <sup>a</sup> |
|-------------|----------------|--------------|--------------------------------|------------|------------|-----------------|
| PSK/spiro/C | Rev            | 0.96 ± 0.02  | 20.5 ± 0.5                     | 59.8 ± 3.1 | 11.7 ± 0.6 | 0.176 ± 0.048   |
|             | FW             | 0.94 ± 0.02  | 20.7 ± 0.5                     | 49.8 ± 3.5 | 9.7 ± 0.7  |                 |
| PSK/CuSCN/C | Rev            | 1.01 ± 0.01  | 20.4 ± 0.3                     | 68.8 ± 1.7 | 14.1 ± 0.4 | 0.068 ± 0.033   |
|             | FW             | 1.02 ± 0.01  | 20.6 ± 0.3                     | 62.8 ± 1.7 | 13.2 ± 0.5 |                 |

<sup>a</sup>Hysteresis index =  $(PCE_{Rev} - PCE_{FW})/PCE_{Rev}$

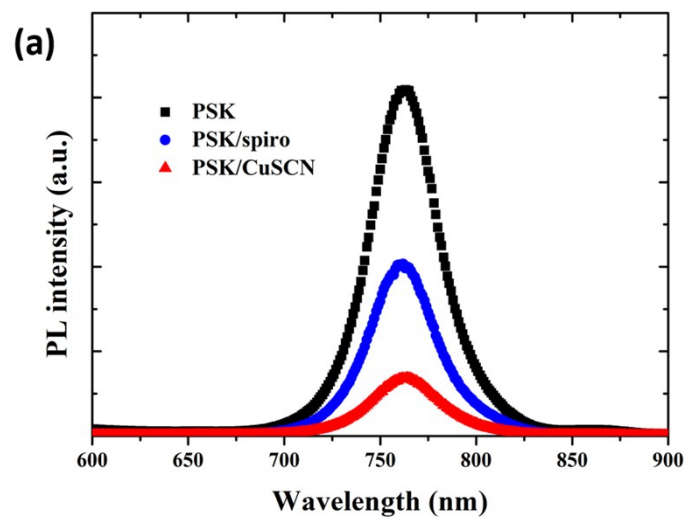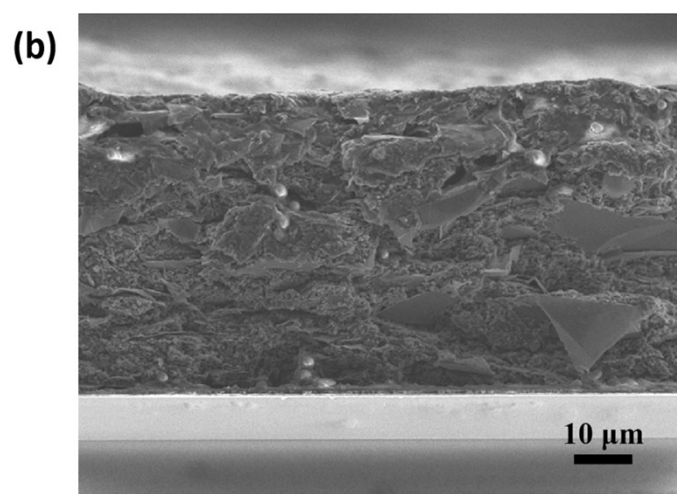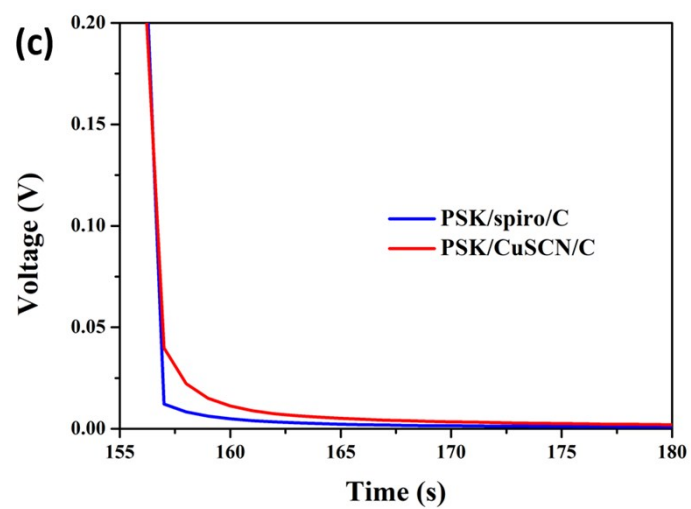

Figure S3. (a) Steady-state PL spectrum of various films and the excitation wavelength is 487 nm. (b) Cross-sectional SEM image of carbon film on the device. (c) Zoomed-in plot of  $V_{oc}$  response at the end of the first illumination cycle.

Table S2. Characteristic photovoltaic parameters of PSCs measured under 1 sun illumination condition at different scan rates.

| sample      | scan rate | scan direction | $V_{oc}$ (V) | $J_{sc}$ (mA/cm <sup>2</sup> ) | FF (%) | PCE (%) | HI <sup>a</sup> |
|-------------|-----------|----------------|--------------|--------------------------------|--------|---------|-----------------|
| PSK/spiro/C | 300 mV/s  | Rev            | 0.94         | 20.9                           | 61.6   | 12.1    | 0.273           |
|             |           | FW             | 0.92         | 20.9                           | 45.7   | 8.8     |                 |
|             | 200 mV/s  | Rev            | 0.95         | 20.8                           | 61.8   | 12.2    | 0.197           |
|             |           | FW             | 0.92         | 20.9                           | 50.6   | 9.8     |                 |
|             | 140 mV/s  | Rev            | 0.94         | 20.7                           | 60.0   | 11.5    | 0.087           |
|             |           | FW             | 0.94         | 20.7                           | 54.3   | 10.5    |                 |
|             | 50 mV/s   | Rev            | 0.95         | 20.7                           | 59.9   | 11.8    | 0.110           |
|             |           | FW             | 0.93         | 20.8                           | 54.3   | 10.5    |                 |
|             | 14 mV/s   | Rev            | 0.95         | 20.8                           | 60.6   | 12.0    | 0.142           |
|             |           | FW             | 0.93         | 20.8                           | 53.5   | 10.3    |                 |
| PSK/CuSCN/C | 300 mV/s  | Rev            | 1.00         | 21.2                           | 68.9   | 14.6    | 0.062           |
|             |           | FW             | 1.01         | 21.3                           | 63.6   | 13.7    |                 |
|             | 200 mV/s  | Rev            | 1.00         | 21.0                           | 66.4   | 13.9    | 0.022           |
|             |           | FW             | 1.01         | 21.3                           | 63.3   | 13.6    |                 |
|             | 140 mV/s  | Rev            | 1.00         | 20.9                           | 66.3   | 13.9    | 0.036           |
|             |           | FW             | 1.01         | 21.3                           | 62.8   | 13.4    |                 |
|             | 50 mV/s   | Rev            | 1.00         | 20.9                           | 67.1   | 14.0    | 0.021           |
|             |           | FW             | 0.99         | 21.0                           | 65.9   | 13.7    |                 |
|             | 14 mV/s   | Rev            | 1.00         | 20.8                           | 68.8   | 14.3    | 0.035           |
|             |           | FW             | 0.97         | 20.9                           | 67.9   | 13.8    |                 |

<sup>a</sup>Hysteresis index =  $(PCE_{Rev} - PCE_{FW})/PCE_{Rev}$

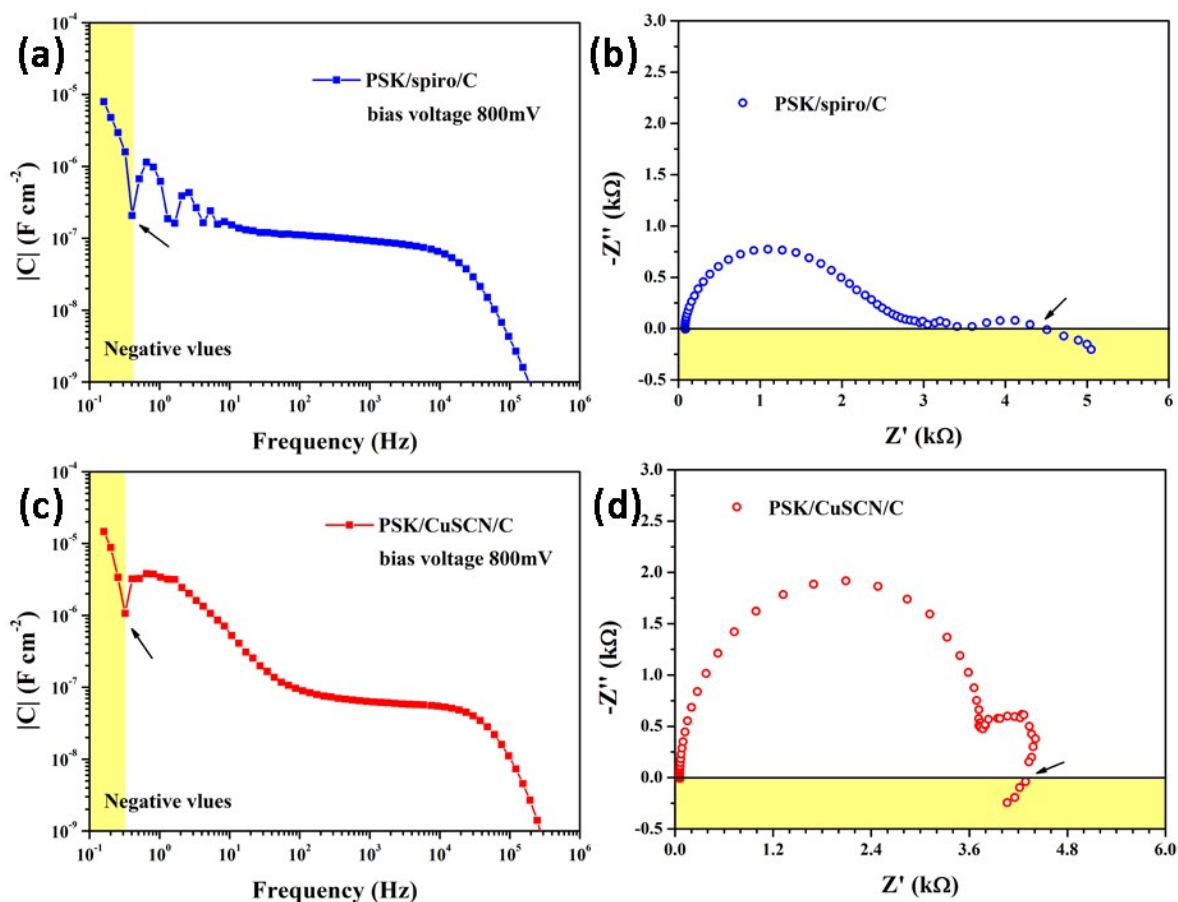

Figure S4. Absolute values of capacitance as a function of frequency obtained in the dark at 800 mV bias for (a) PSK/spiro/C and (c) PSK/CuSCN/C. The corresponding impedance spectroscopy spectrum for (b) PSK/spiro/C and (d) PSK/CuSCN/C.

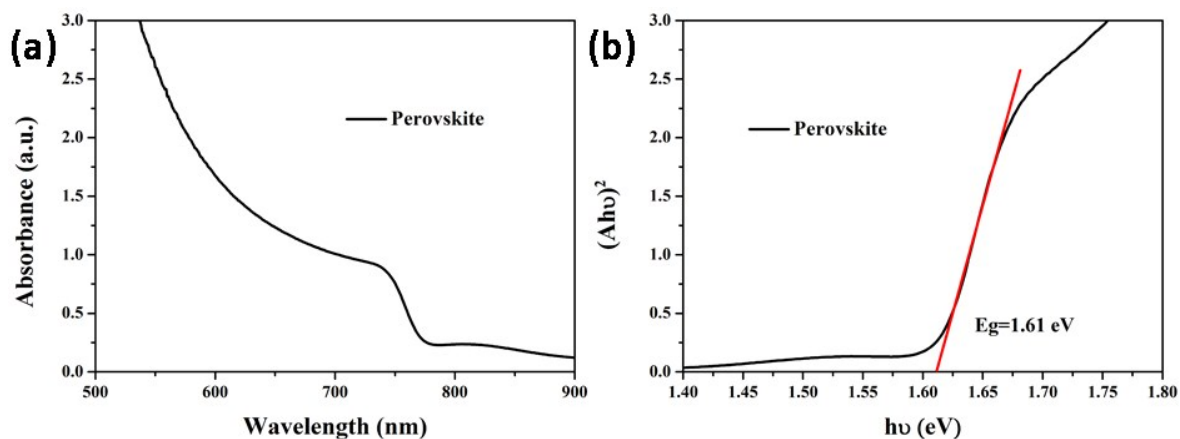

Figure S5. (a) UV-vis absorption spectra of triple cation perovskite film. (b) Evolution of optical band gap of perovskite film according to the absorbance spectrum.

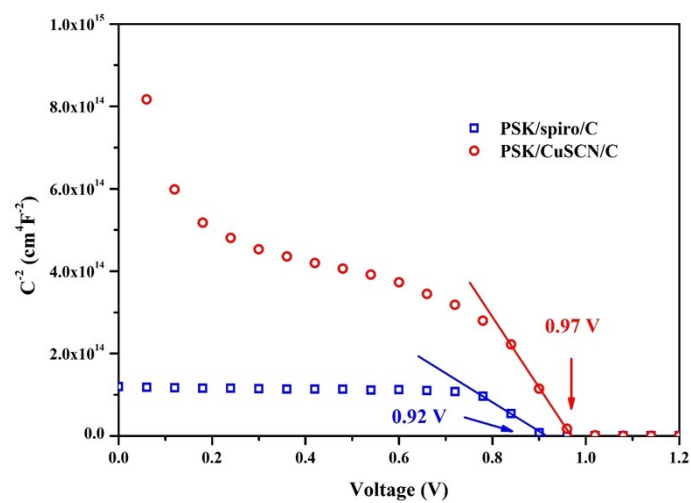

Figure S6. Capacitance as a function of voltage bias in the Mott-Schottky plot for PSK/spiro/C and PSK/CuSCN/C, respectively.

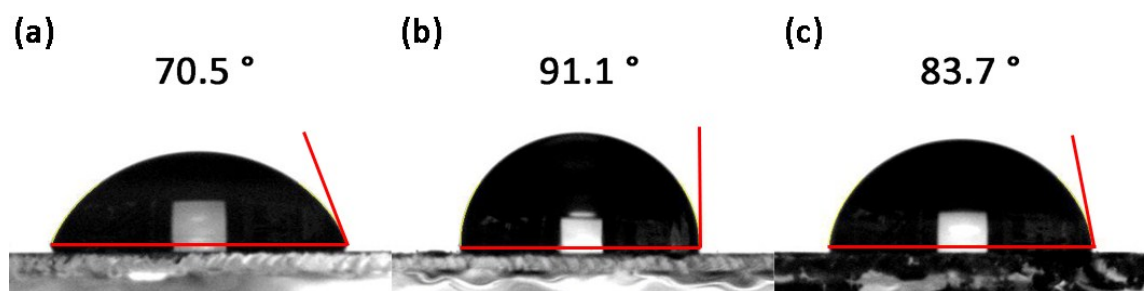

Figure S7. Characterization of the wettability of (a) triple cation perovskite layer, (b) spiro-OMeTAD layer and (c) CuSCN layer measured at 60 s after water droplet deposition.

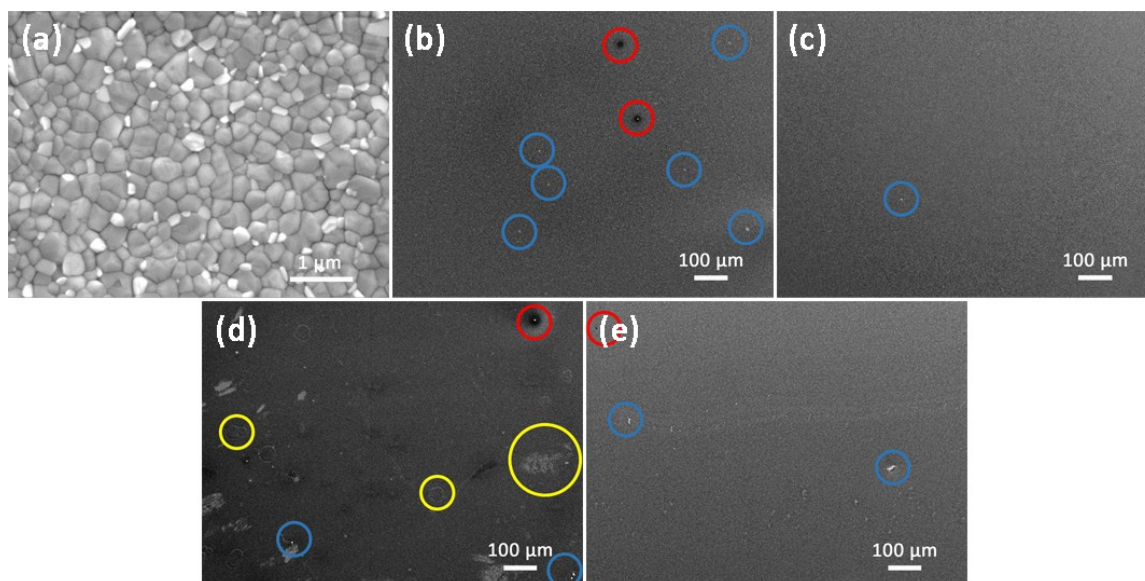

Figure S8. Top-view SEM images of fresh (a) triple cation perovskite film (b) spiro-OmeTAD layer on perovskite film and (c) CuSCN layer on perovskite film, (d) spiro-OmeTAD layer and (e) CuSCN layer aging for 80 days (humidity: 55-70%). Particles, holes and exposed area are in red, blue and yellow circles, respectively.

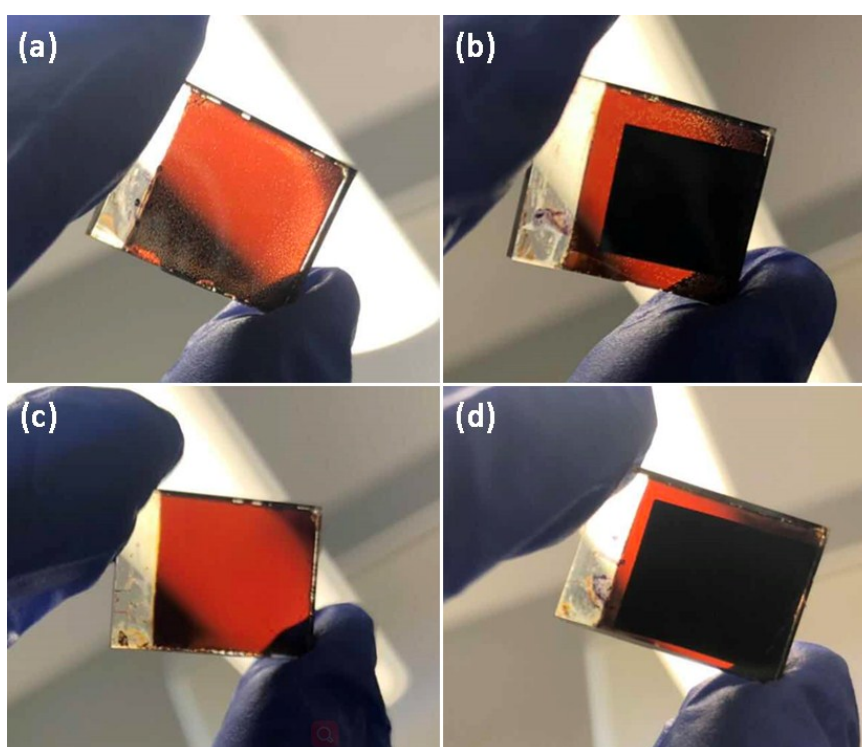

Figure S9. Digital images of (a) spiro-OMeTAD coated on perovskite, (b) PSK/spiro/C, (c) CuSCN coated on perovskite and (d) PSK/CuSCN/C aging for 80 days stored in ambient condition (relative humidity: 55-70%).
